# Supplementary material
Source: Research Square preprint supplement (doi:10.21203/rs.3.rs-9055273/v2)

**Supplementary Information**

**Additional Raman Analysis Supporting Thermal Hysteresis**

This Supplementary Information provides additional analysis of the Raman spectra used to quantify thermal hysteresis in the main manuscript. The analysis includes peak fitting, uncertainty estimation, hysteresis loop quantification, and linewidth evolution for two spatial locations on the sample.

**Supplementary Methods**

**Raman Spectroscopy**

Raman spectra were collected using a **532 nm excitation laser** and a **50× objective**. Spectra were acquired in the spectral range **1200–3200 cm⁻¹**, covering both the **G (~1580 cm⁻¹)** and **2D (~2680 cm⁻¹)** Raman modes.

Experimental parameters were:

| **Parameter** | **Value** |
| --- | --- |
| Laser wavelength | 532 nm |
| Spectral resolution | ~1.9 cm⁻¹ |
| Acquisition time | 30 s |
| Accumulations | 1 |
| Objective | 50× |

Temperature-dependent measurements were performed during controlled **heating and cooling cycles** at:

300 K, 350 K, 400 K, 450 K, and 500 K.

Spectra were recorded at two spatial positions on the sample, referred to as **Spot 1** and **Spot 2**.

At each temperature, one spectrum was collected during heating and one during cooling.

**Raman Peak Extraction**

The **G** and **2D** Raman modes were extracted using **Lorentzian peak fitting with a linear background**.

The fitting model was:

where

- is the peak center
- is the full width at half maximum (FWHM)
- is the peak amplitude
- represents the linear baseline.

Peak fitting was performed using nonlinear least-squares optimization.

Uncertainties were obtained from the **covariance matrix of the fit parameters**.

**Measurement Uncertainty**

The uncertainty in peak position corresponds to the **1σ confidence interval obtained from the Lorentzian fit covariance matrix**.

Typical uncertainties across the dataset were:

| **Quantity** | **Typical uncertainty** |
| --- | --- |
| G peak center | 0.1–0.5 cm⁻¹ |
| 2D peak center | 0.1–0.7 cm⁻¹ |
| FWHM | 0.3–1 cm⁻¹ |

These uncertainties are represented as **vertical error bars in the supplementary figures**.

Because a single spectrum was collected at each temperature point, uncertainties arise from **peak fitting precision rather than repeated measurements**.

**Quantification of Raman Hysteresis**

Thermal hysteresis was quantified by calculating the temperature-integrated separation between the heating and cooling trajectories.

The loop area was defined as

where

- is the Raman peak position measured during heating
- is the Raman peak position measured during cooling.

Numerical integration was performed using the **trapezoidal rule**.

**Uncertainty Propagation**

The uncertainty in loop area was propagated from the uncertainties in the extracted peak positions:

where represents the trapezoidal integration weights and and are the uncertainties in the heating and cooling peak positions at temperature .

**Supplementary Table S1**

**Loop Area and Statistical Significance**

| **Spot** | **Mode** | **Loop area (cm⁻¹·K)** | **Uncertainty** | **Significance** |
| --- | --- | --- | --- | --- |
| Spot 1 | G | 749.7 | ±24.9 | 30 σ |
| Spot 1 | 2D | 711.1 | ±34.2 | 21 σ |
| Spot 2 | G | 189.0 | ±31.5 | 6 σ |
| Spot 2 | 2D | 295.1 | ±55.7 | 5 σ |

All hysteresis loops exceed **3σ statistical significance**, confirming that the separation between heating and cooling trajectories is well above measurement uncertainty.

**Supplementary Figures**

**Figure S1**

G peak position as a function of temperature for **Spot 1**.
Error bars represent **1σ uncertainties obtained from Lorentzian peak fitting**.

**Figure S2**

G peak position as a function of temperature for **Spot 2**.

**Figure S3**

2D peak position as a function of temperature for **Spot 1**.

**Figure S4**

2D peak position as a function of temperature for **Spot 2**.

**Figure S5**

Temperature dependence of the **G-mode linewidth (FWHM)** for **Spot 1**.

**Figure S6**

Temperature dependence of the **G-mode linewidth (FWHM)** for **Spot 2**.

**Figure S7**

Temperature dependence of the **2D-mode linewidth (FWHM)** for **Spot 1**.

**Figure S8**

Temperature dependence of the **2D-mode linewidth (FWHM)** for **Spot 2**.

**Statistical Significance of the Hysteresis**

The maximum separation between heating and cooling curves reaches approximately **2–4 cm⁻¹**, while the measurement uncertainty is typically **≈0.3 cm⁻¹**.

Thus the signal-to-noise ratio is

which significantly exceeds the **3σ threshold**, confirming that the observed Raman hysteresis is statistically robust.

**Data Availability**

The Raman spectra used for this analysis are provided in the accompanying dataset.


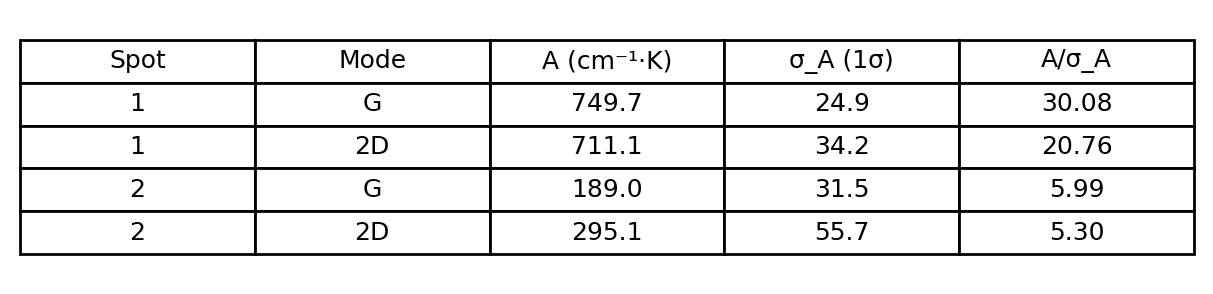

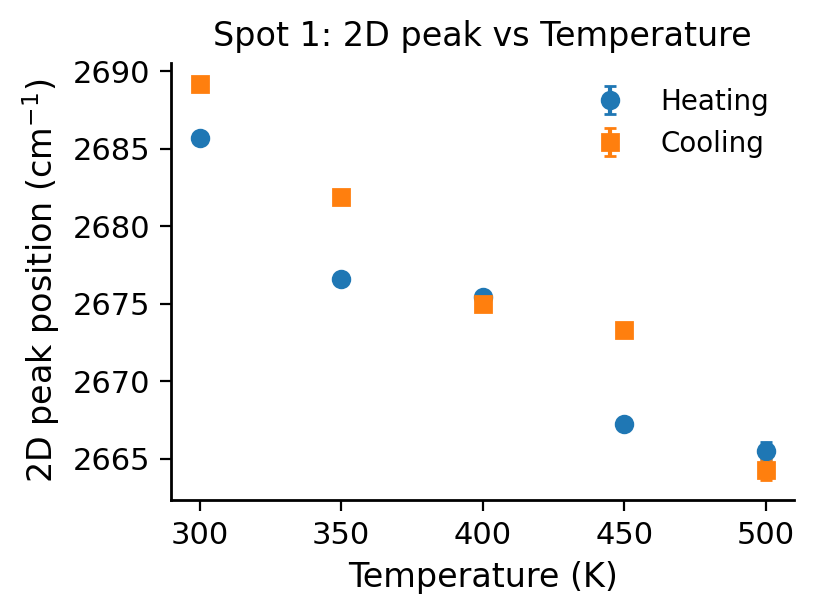

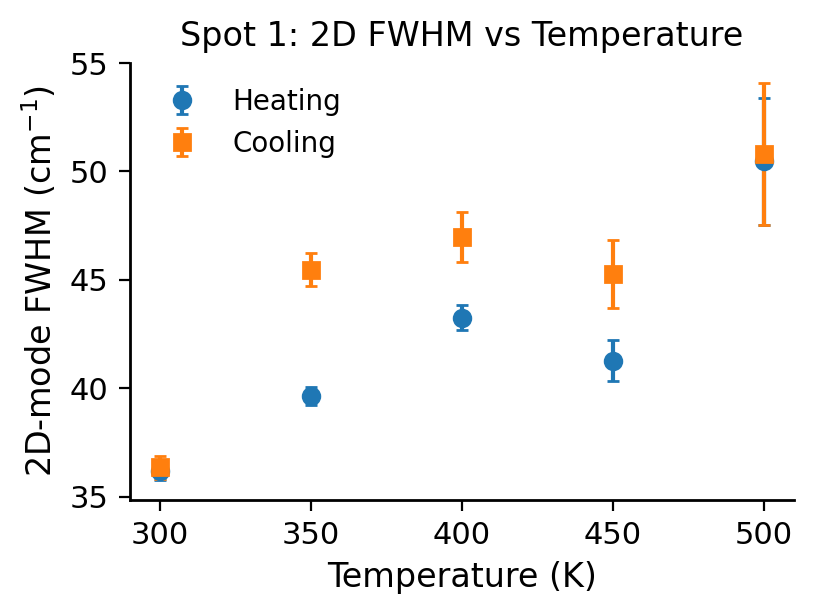

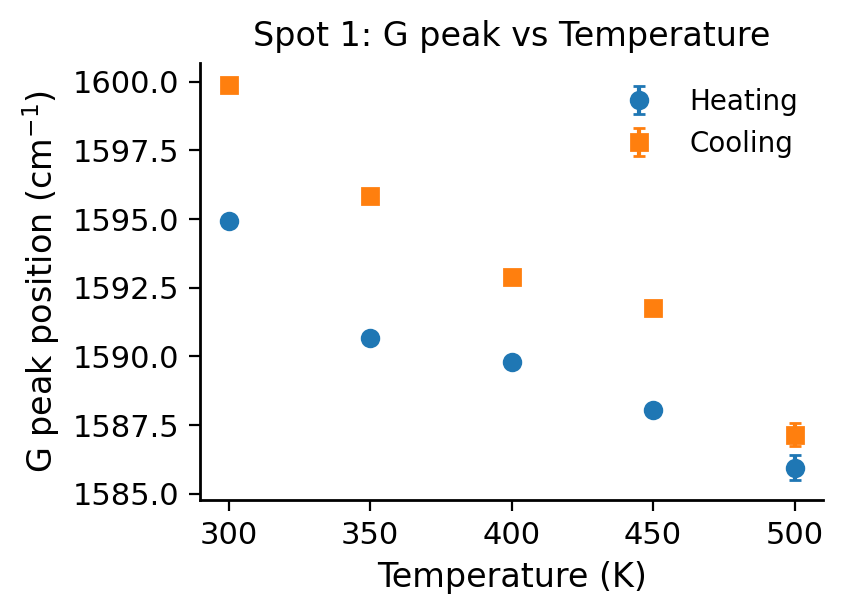

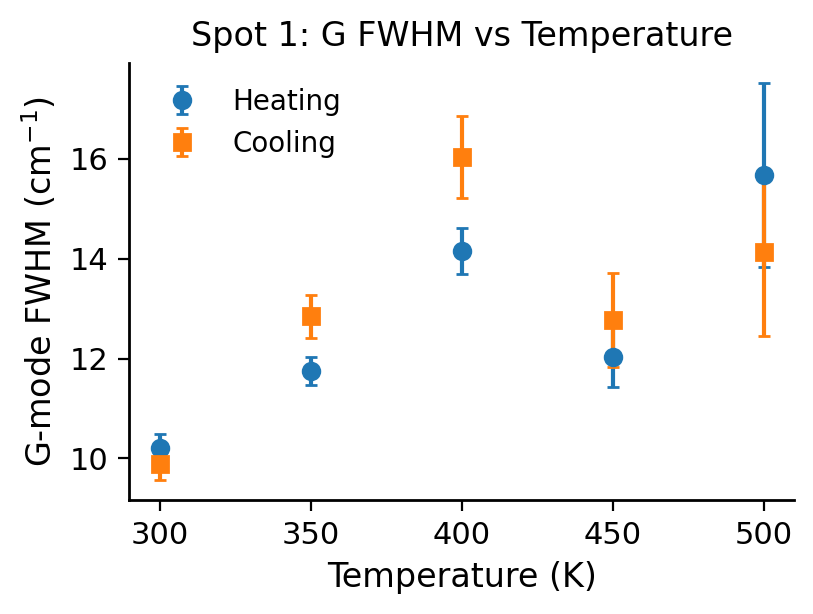

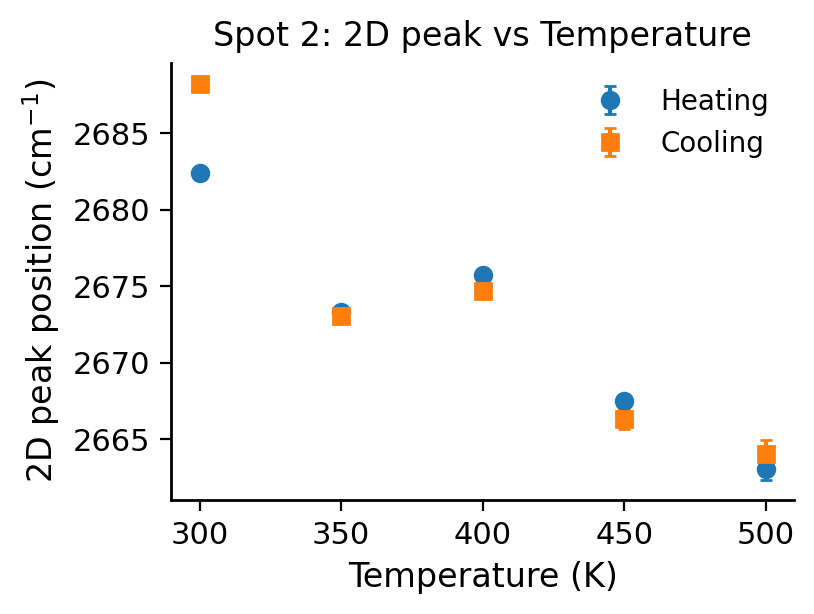

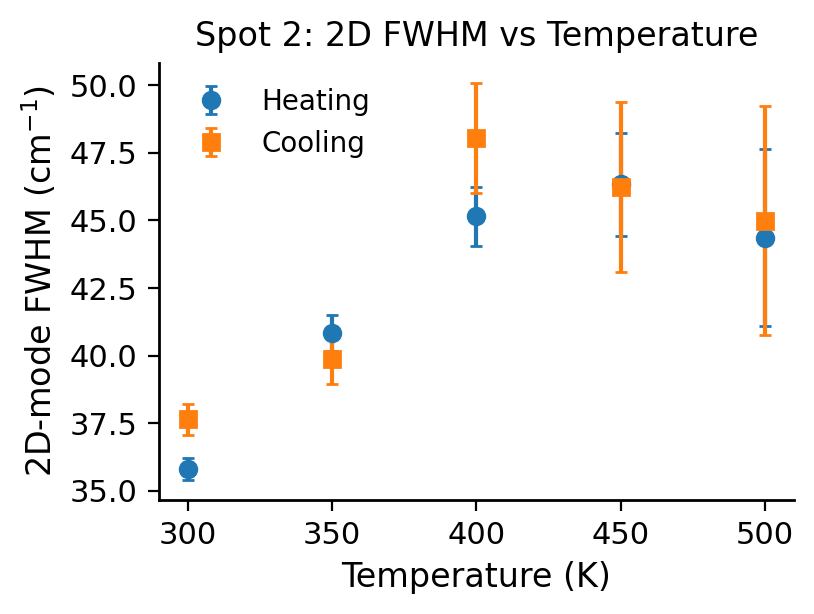

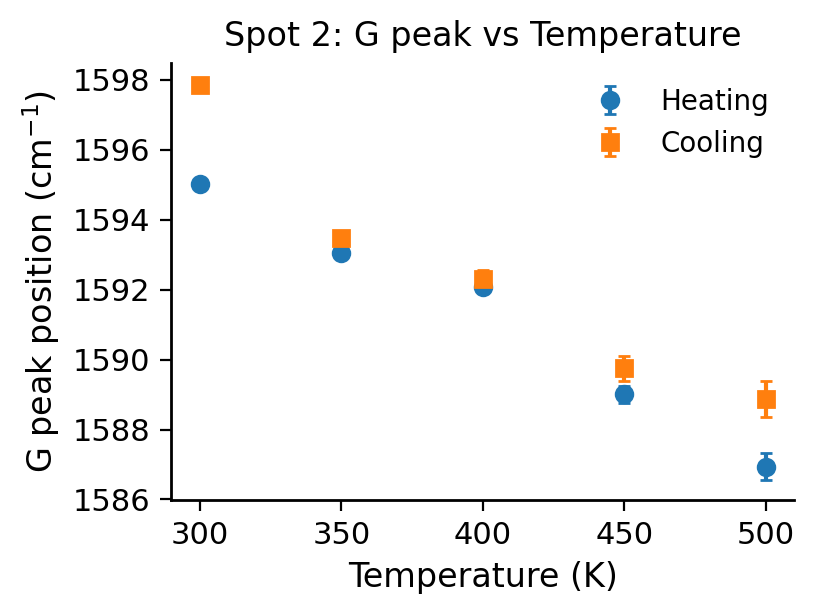

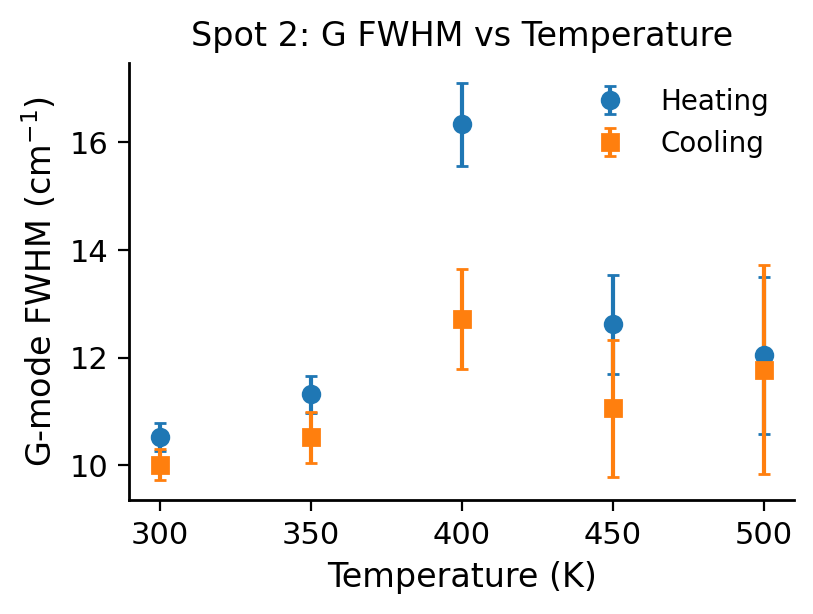


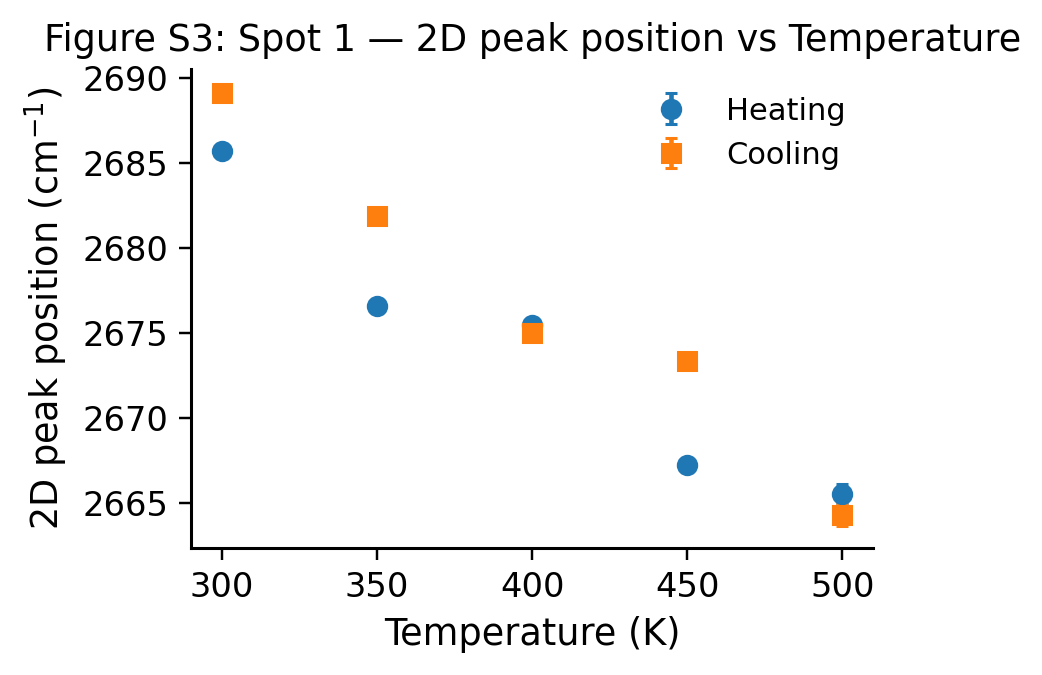

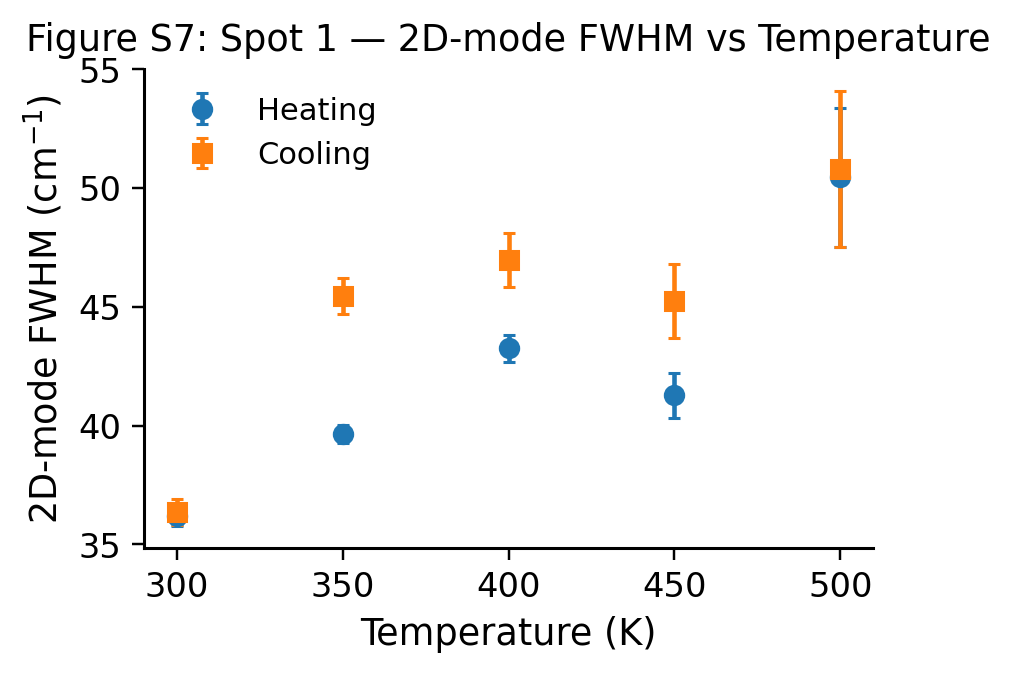

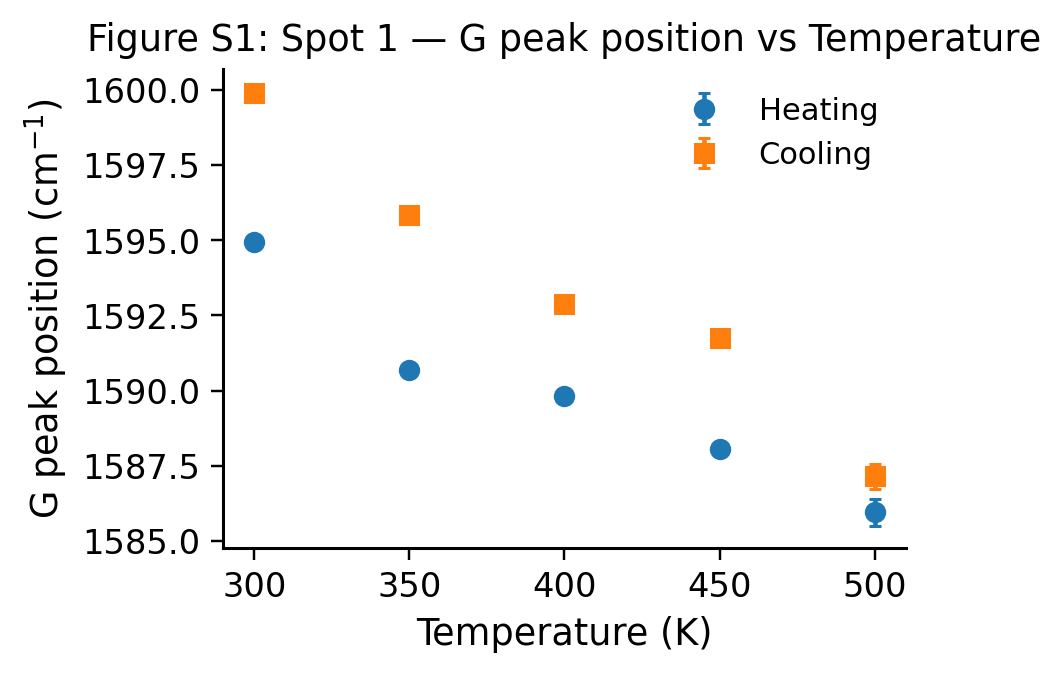

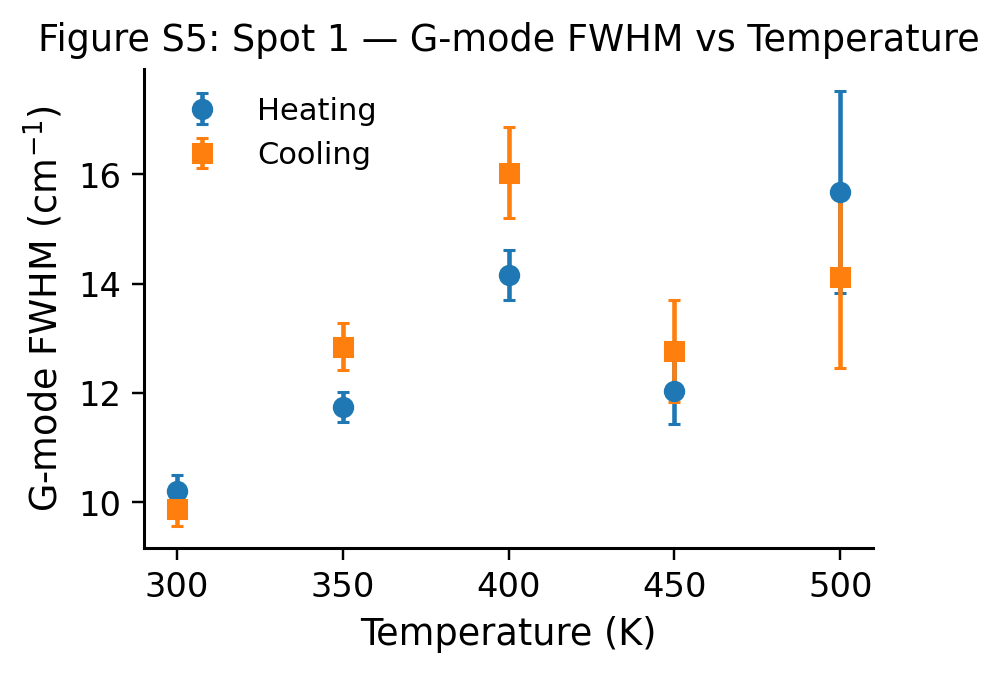

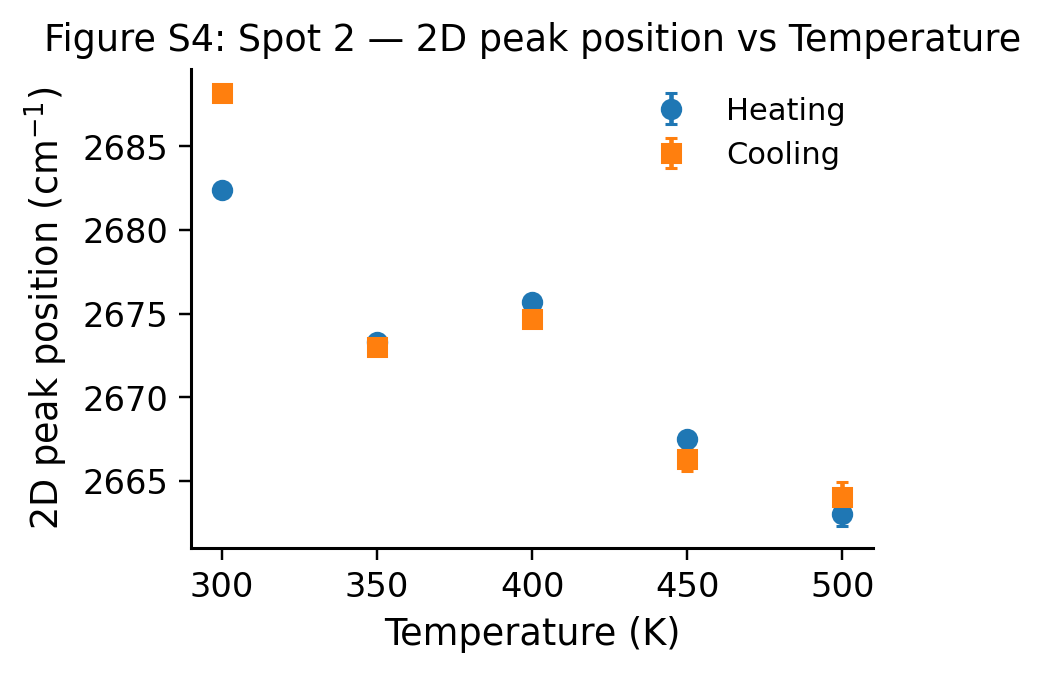

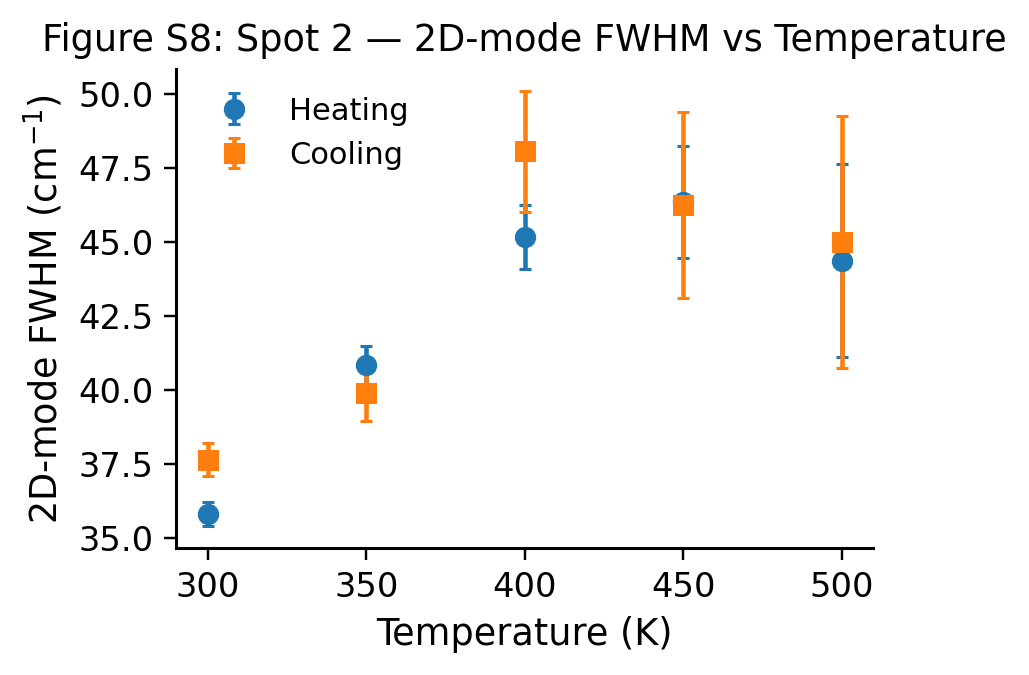

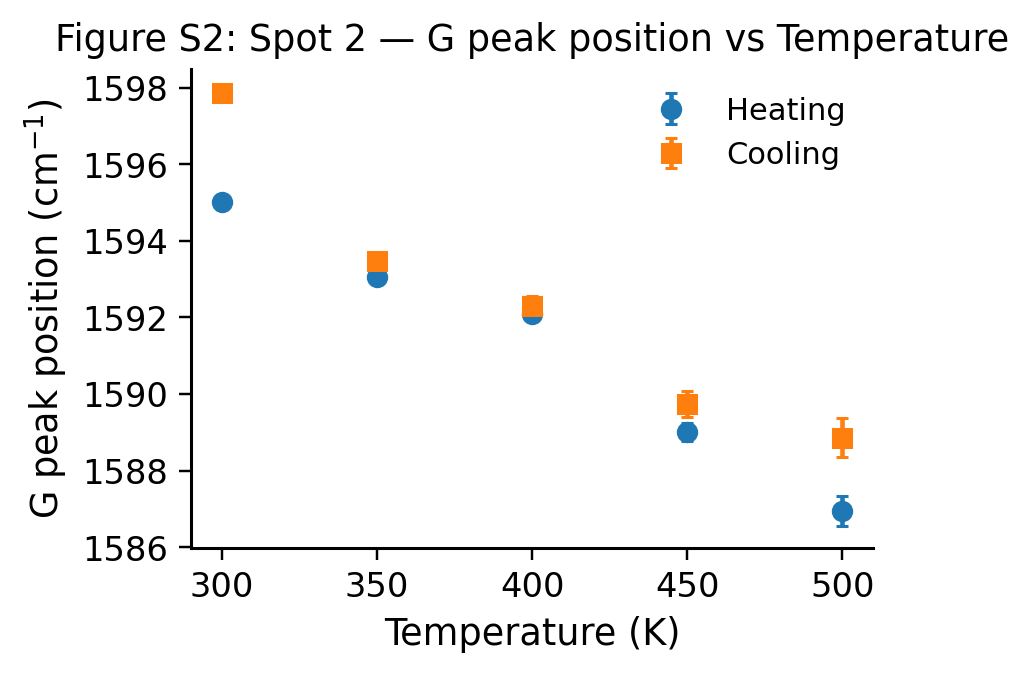

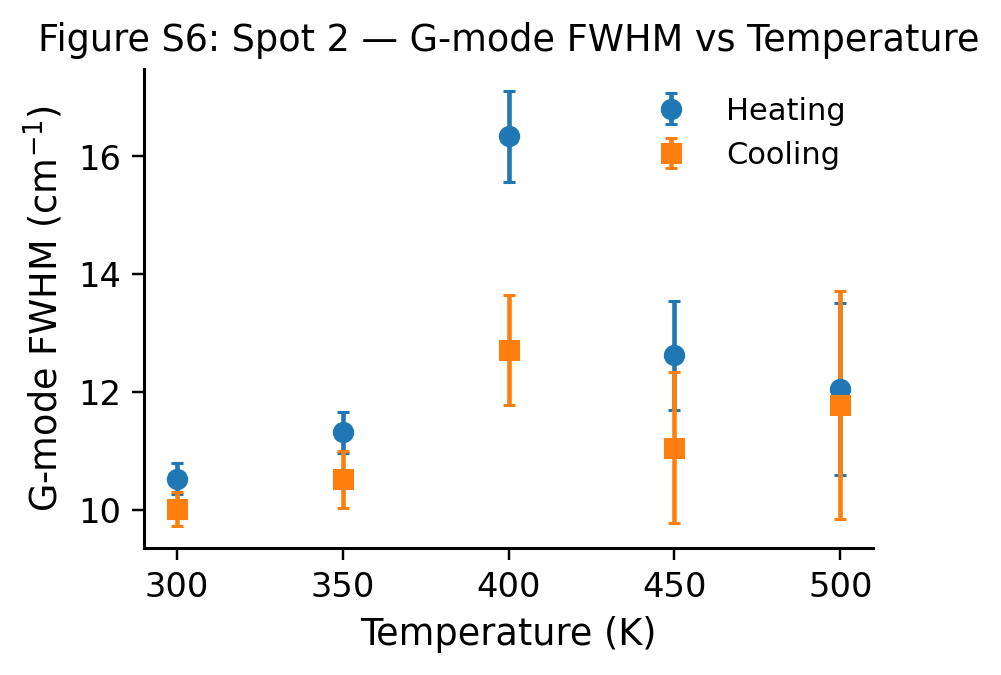

Supplement: Supplementary file 1 [file 2e1eca0d10eabc24069ca327.docx]
